# Supplementary material
Source: PubMed Central journal article supplement (PMC117387)

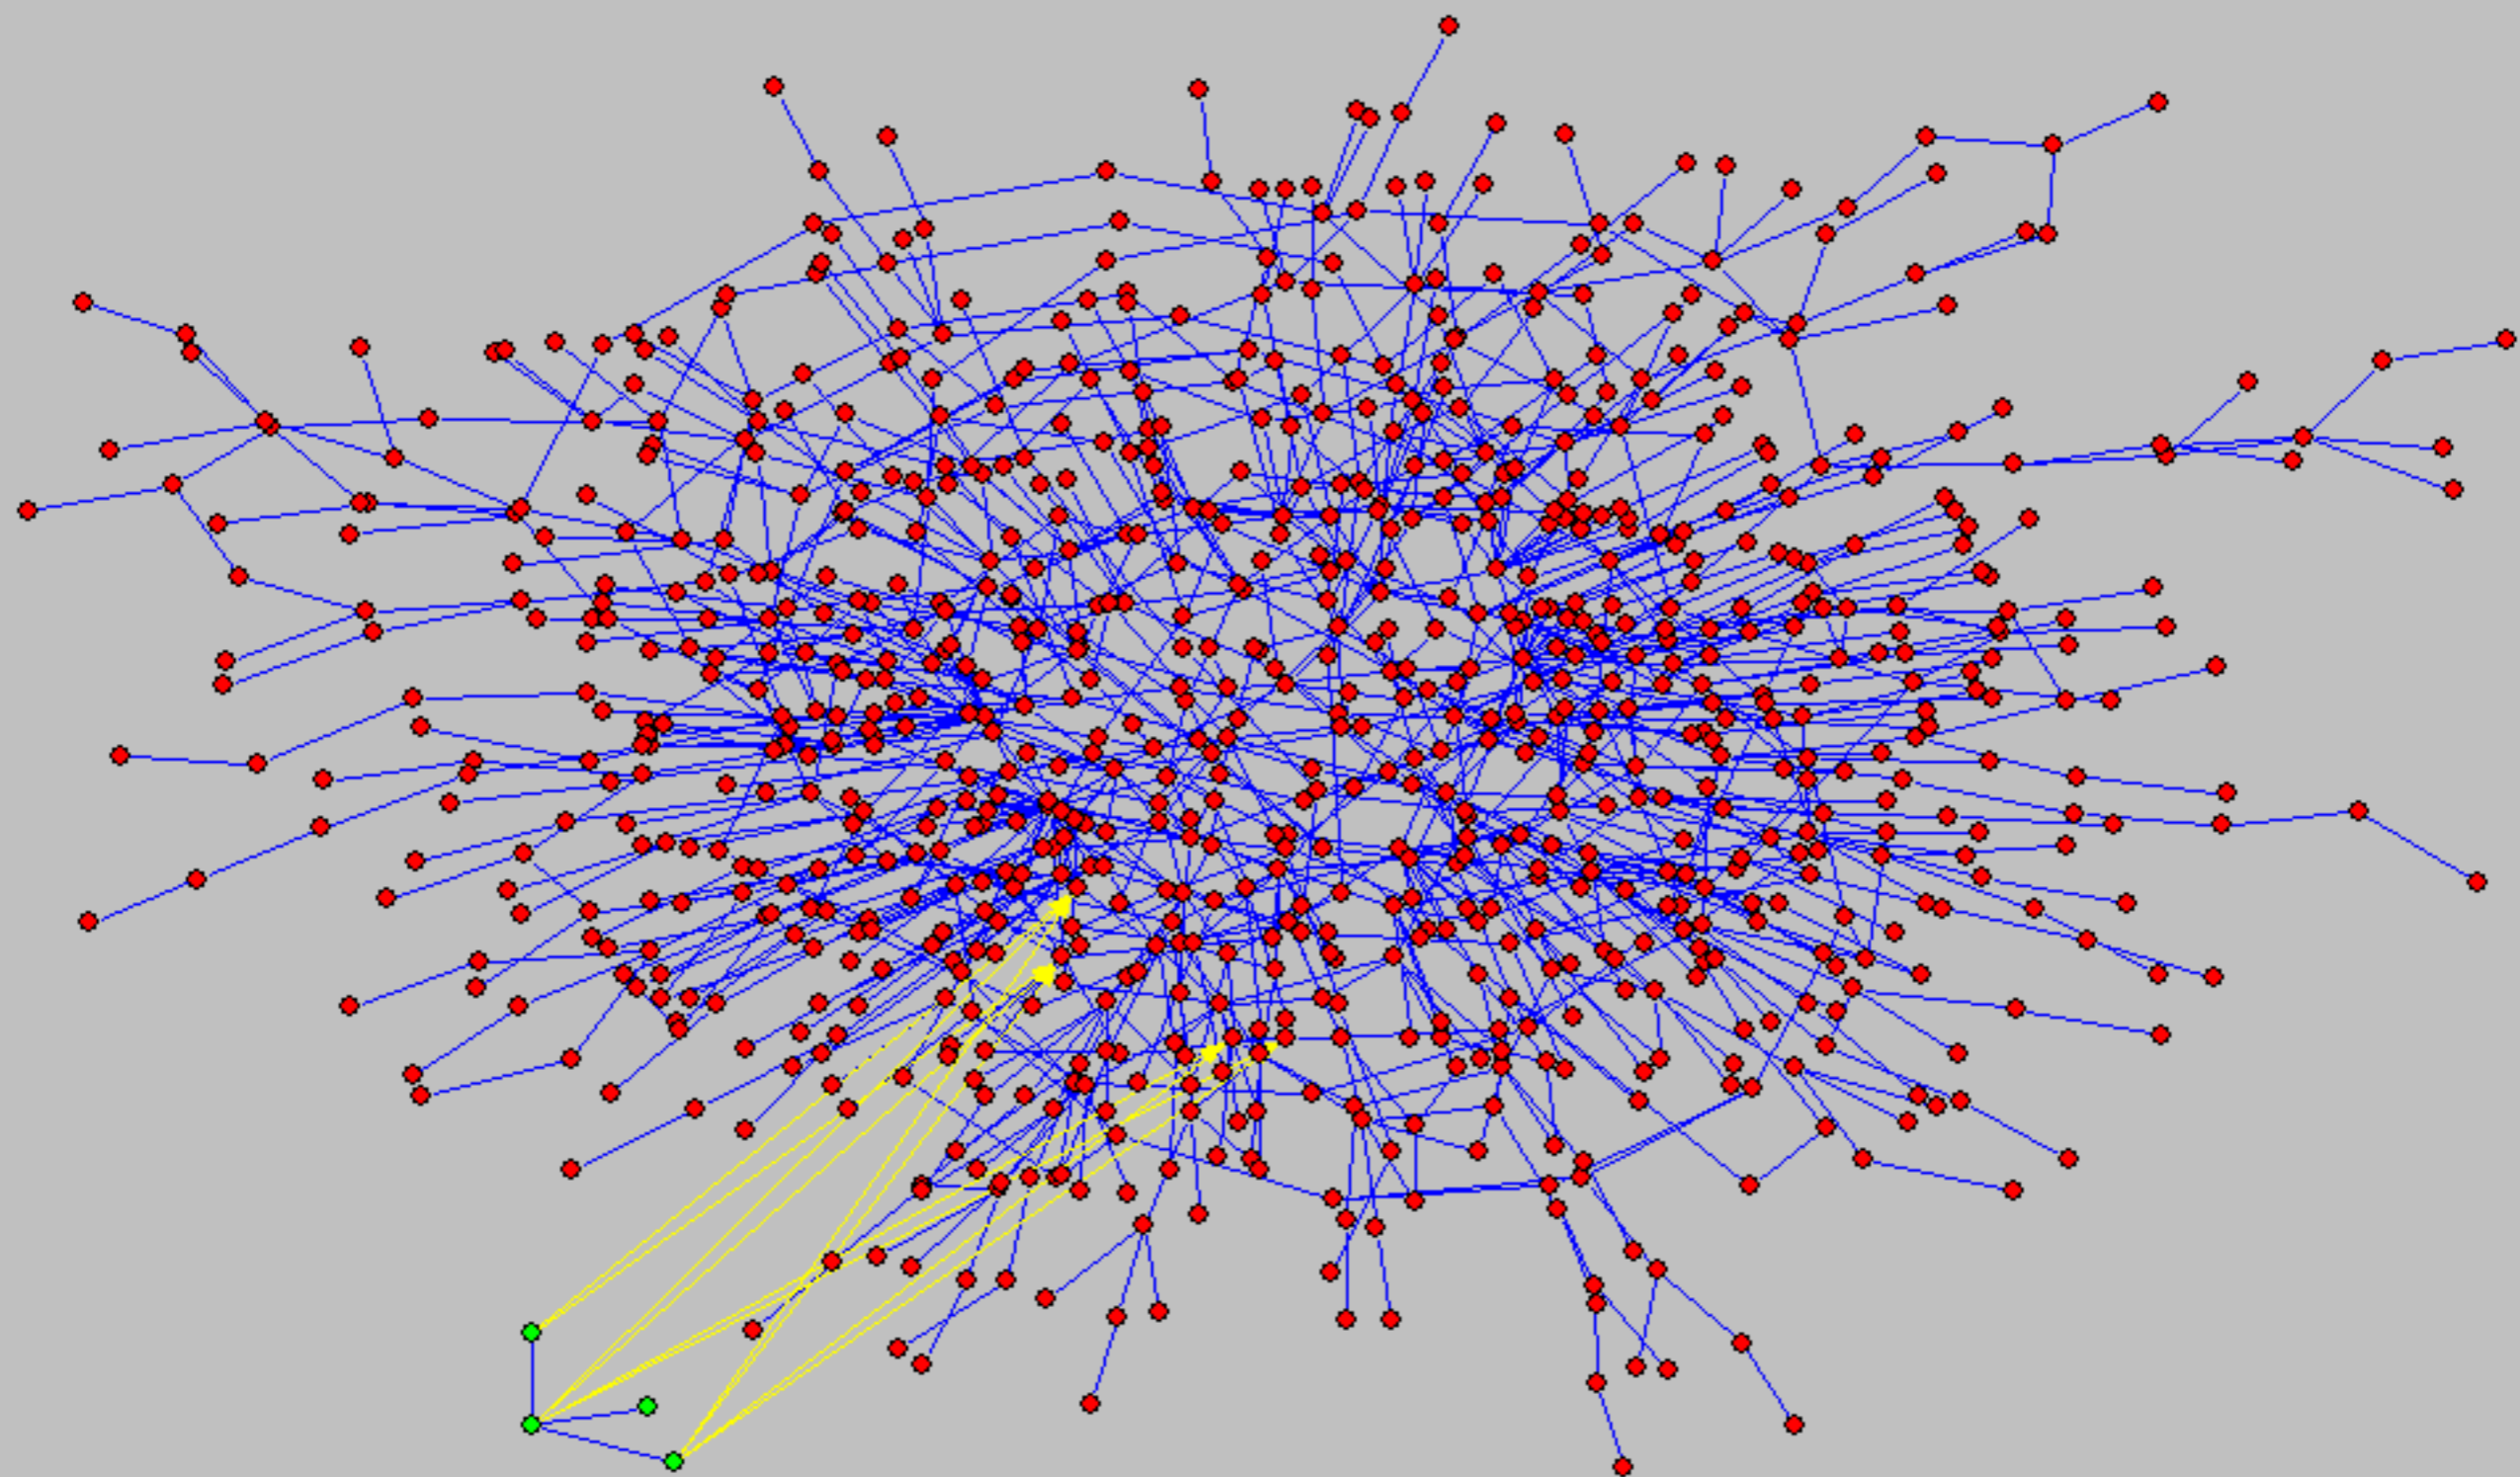

Supplement: pnas_99_2_809__2.pdf [file pnas_99_2_809__2.pdf]
